# Supplementary material for: Correlation between Histopathological Prognostic Tumor Characteristics and [18F]FDG Uptake in Corresponding Metastases in Newly Diagnosed Metastatic Breast Cancer
Source: MDPI journal article supplement (doi:10.3390/diagnostics14040416), 2024-02-14
Supplement: s1 [file s1]

**Supplemental S4.** Lesions not visible on [<sup>18</sup>F]FDG-PET. Lesions without [<sup>18</sup>F]FDG uptake above background on the PET scan. In 175/182 patients the lesion showed [<sup>18</sup>F]FDG uptake above background on the PET scan. The remaining seven lesions were not visible on [<sup>18</sup>F]FDG-PET

| Histological subtype       | ER status | % ER | HER2 status | Location            | Size on CT     |
|----------------------------|-----------|------|-------------|---------------------|----------------|
| Invasive carcinoma NST     | Positive  | 100  | Negative    | Axillary lymph node | <10mm          |
| Invasive carcinoma NST     | Positive  | 100  | Negative    | Ilium (bone)        | not measurable |
| Invasive carcinoma NST     | Positive  | 100  | Negative    | Liver               | 17mm           |
| Invasive carcinoma NST     | Positive  | 100  | Negative    | Liver               | 12mm           |
| Invasive carcinoma NST     | Positive  | 100  | Negative    | Breast skin         | not measurable |
| Invasive carcinoma NST     | Positive  | 100  | Negative    | Lung                | 14mm           |
| Invasive lobular carcinoma | Positive  | 100  | Negative    | Abdominal skin      | <10mm          |
