# Supplementary material for: Correlation between Histopathological Prognostic Tumor Characteristics and [18F]FDG Uptake in Corresponding Metastases in Newly Diagnosed Metastatic Breast Cancer
Source: MDPI journal article supplement (doi:10.3390/diagnostics14040416), 2024-02-14

## Extra information on Supplemental Data

### Supplemental S1. [<sup>18</sup>F]FDG Uptake and SUV Measures

We assessed the effect of SUV calculation method (SUV<sub>max</sub>, SUV<sub>peak</sub>, and SUV<sub>mean</sub>) on per lesion [<sup>18</sup>F]FDG uptake in all 188 patients. There was a high correlation between SUV<sub>max</sub> and SUV<sub>peak</sub> (Pearson's  $r=0.98$ ;  $p<0.001$ ), SUV<sub>max</sub> and SUV<sub>mean</sub> (Pearson's  $r=0.93$ ;  $p<0.001$ ), and also between SUV<sub>peak</sub> and SUV<sub>mean</sub> (Pearson's  $r=0.94$ ;  $p<0.001$ ; Supplemental Figure S1).

**Supplemental Figure S1.** Correlation of A) [<sup>18</sup>F]FDG uptake (SUV<sub>max</sub>) and [<sup>18</sup>F]FDG uptake (SUV<sub>peak</sub>), B) [<sup>18</sup>F]FDG uptake (SUV<sub>max</sub>) and [<sup>18</sup>F]FDG uptake (SUV<sub>mean</sub>), and C) [<sup>18</sup>F]FDG uptake (SUV<sub>peak</sub>) and [<sup>18</sup>F]FDG uptake (SUV<sub>mean</sub>).

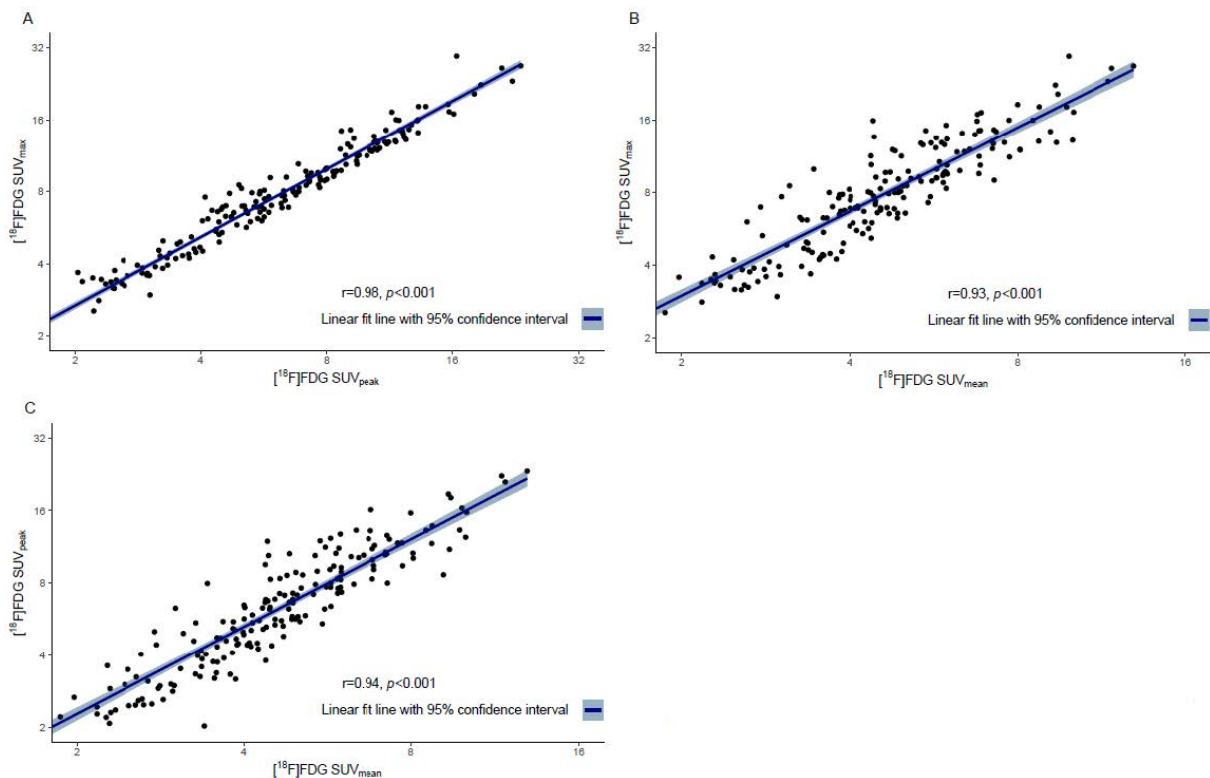

Supplement: s1 [file s1]
