# Supplementary material for: Correlation between Histopathological Prognostic Tumor Characteristics and [18F]FDG Uptake in Corresponding Metastases in Newly Diagnosed Metastatic Breast Cancer
Source: MDPI journal article supplement (doi:10.3390/diagnostics14040416), 2024-02-14

**Supplemental S2.** Correlation of [18F]FDG uptake (SUVmax) uptake and tumor lesions on diagnostic CT (expressed as volume)

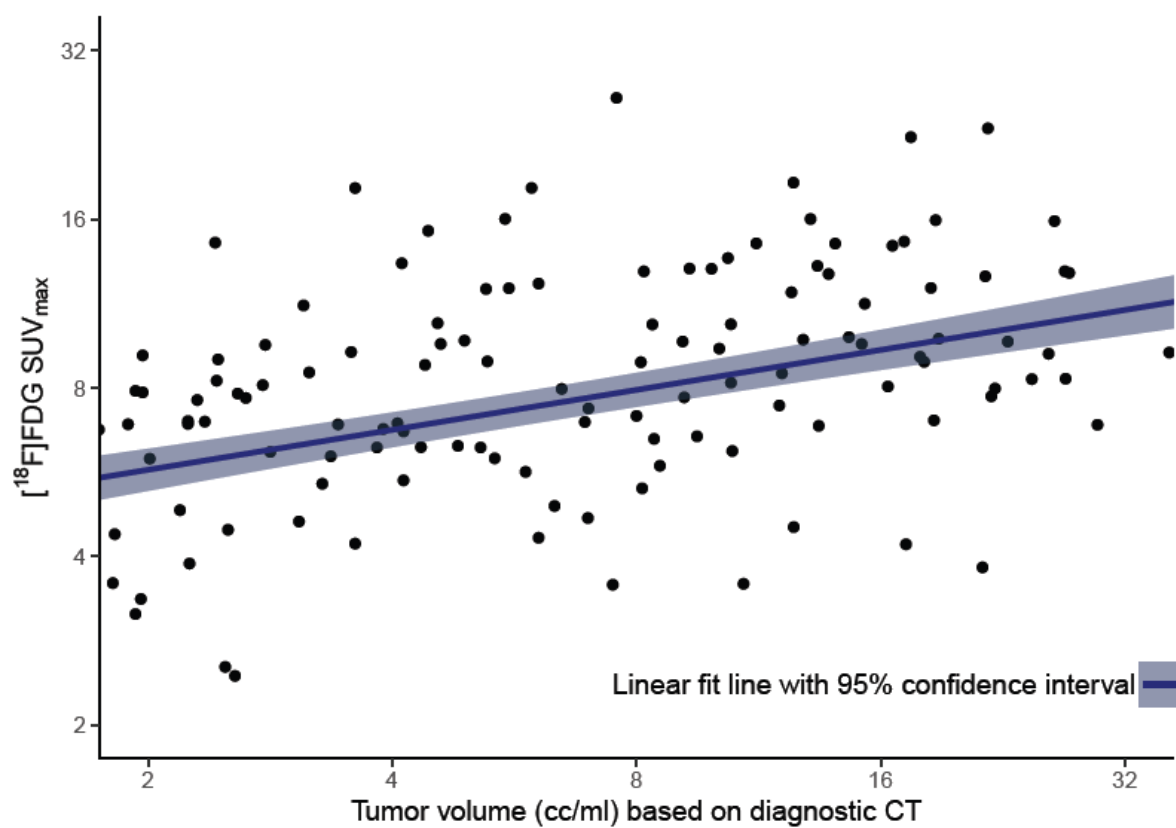

Supplement: s1 [file s1]
