# Supplementary material for: Correlation between Histopathological Prognostic Tumor Characteristics and [18F]FDG Uptake in Corresponding Metastases in Newly Diagnosed Metastatic Breast Cancer
Source: Diagnostics (Basel). 2024 Feb 14;14(4):416. doi: 10.3390/diagnostics14040416 (PMC10887896; doi:10.3390/diagnostics14040416)
Supplement: Supplementary file 1 [file diagnostics-14-00416-s001.zip]

Archive with 4 entries (4 files):
- diagnostics-2806305-supplemental_1.pdf
- diagnostics-2806305-supplemental_2.pdf
- diagnostics-2806305-Supplemental_3.pdf
- diagnostics-2806305-supplemental_4.pdf
